# Supplementary material
Source: Copernicus journal article supplement (doi:10.5194/egusphere-2026-3563)
Supplement: Supplementary file 1 [file egusphere-2026-3563-supplement.pdf]

## **Supplementary**

# **Persistent and non-negligible aerodynamic entrainment during dust emission: new evidence from field observations and wind tunnel experiments**

### **Contents of this file**

Table S1

Figures S1 to S4

Table S1. Statistics of observation plot information

| Plots | Land use   | Mean wind<br>speed at 1 m | Mean wind<br>profile $R^2$ | $Z_0$ (m) | Observation<br>scenarios |
|-------|------------|---------------------------|----------------------------|-----------|--------------------------|
| M01   | Crop land  | 3.54                      | 0.91                       | 0.003     | II and IV                |
| M02   | Crop land  | 2.09                      | 0.95                       | 0.006     | II and IV                |
| M03   | Crop land  | 2.70                      | 0.91                       | 0.006     | II and IV                |
| M04   | Shrub land | 4.93                      | 0.94                       | 0.008     | I, II, III and IV        |
| M05   | Crop land  | 5.88                      | 0.94                       | 0.005     | II, III and IV           |
| M06   | Crop land  | 5.41                      | 0.91                       | 0.007     | I, II, III, and IV       |
| M07   | Crop land  | 3.93                      | 0.92                       | 0.005     | II and IV                |
| M08   | Crop land  | 2.62                      | 0.90                       | 0.017     | II and IV                |
| M09   | Crop land  | 6.77                      | 0.89                       | 0.008     | I, II, III, and IV       |
| M10   | Crop land  | 6.76                      | 0.93                       | 0.009     | I, II, III, and IV       |
| M11   | Crop land  | 4.80                      | 0.89                       | 0.005     | I, II, III, and IV       |
| M12   | Crop land  | 4.08                      | 0.91                       | 0.009     | II                       |
| M13   | Bare land  | 7.93                      | 0.84                       | 0.004     | II                       |
| M14   | Crop land  | 4.98                      | 0.90                       | 0.006     | I, II, III, and IV       |
| M15   | Sandy land | 6.62                      | 0.91                       | 0.005     | I, II, III, and IV       |
| M16   | Sandy land | 5.52                      | 0.91                       | 0.004     | I, II, III, and IV       |
| M17   | Bare land  | 5.40                      | 0.90                       | 0.004     | I, II, III, and IV       |
| M18   | Sandy land | 4.12                      | 0.96                       | 0.010     | I, II, III, and IV       |
| S01   | Grassland  | 10.83                     | 0.92                       | 0.036     | I and IV                 |
| S02   | Grassland  | 8.69                      | 0.93                       | 0.032     | II and IV                |
| S03   | Grassland  | 6.10                      | 0.97                       | 0.029     | IV                       |
| S04   | Grassland  | 4.25                      | 0.93                       | 0.019     | IV                       |
| S05   | Sandy land | 7.91                      | 0.94                       | 0.009     | I, II, III and IV        |
| S06   | Grassland  | 3.18                      | 0.92                       | 0.053     | II and IV                |
| S07   | Grassland  | 8.86                      | 0.92                       | 0.050     | I, II and IV             |
| S08   | Grassland  | 5.98                      | 0.91                       | 0.011     | II, III and IV           |
| S09   | Grassland  | 7.32                      | 0.92                       | 0.015     | IV                       |

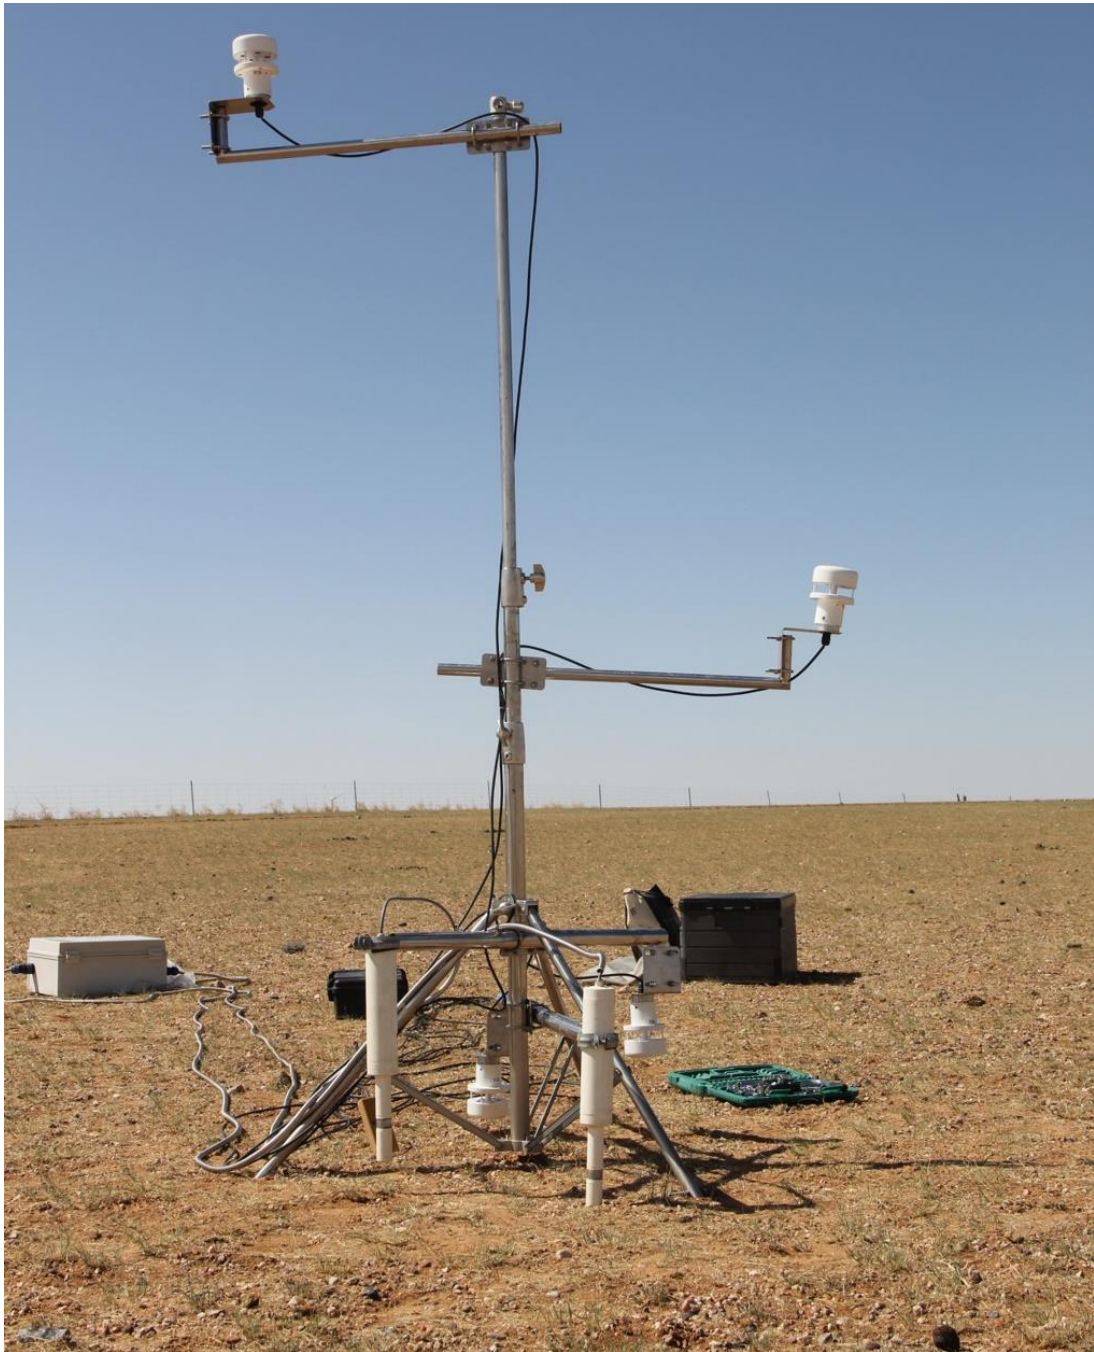

Figure S1. Photograph of the observation plot in the desert steppe of central Inner Mongolia

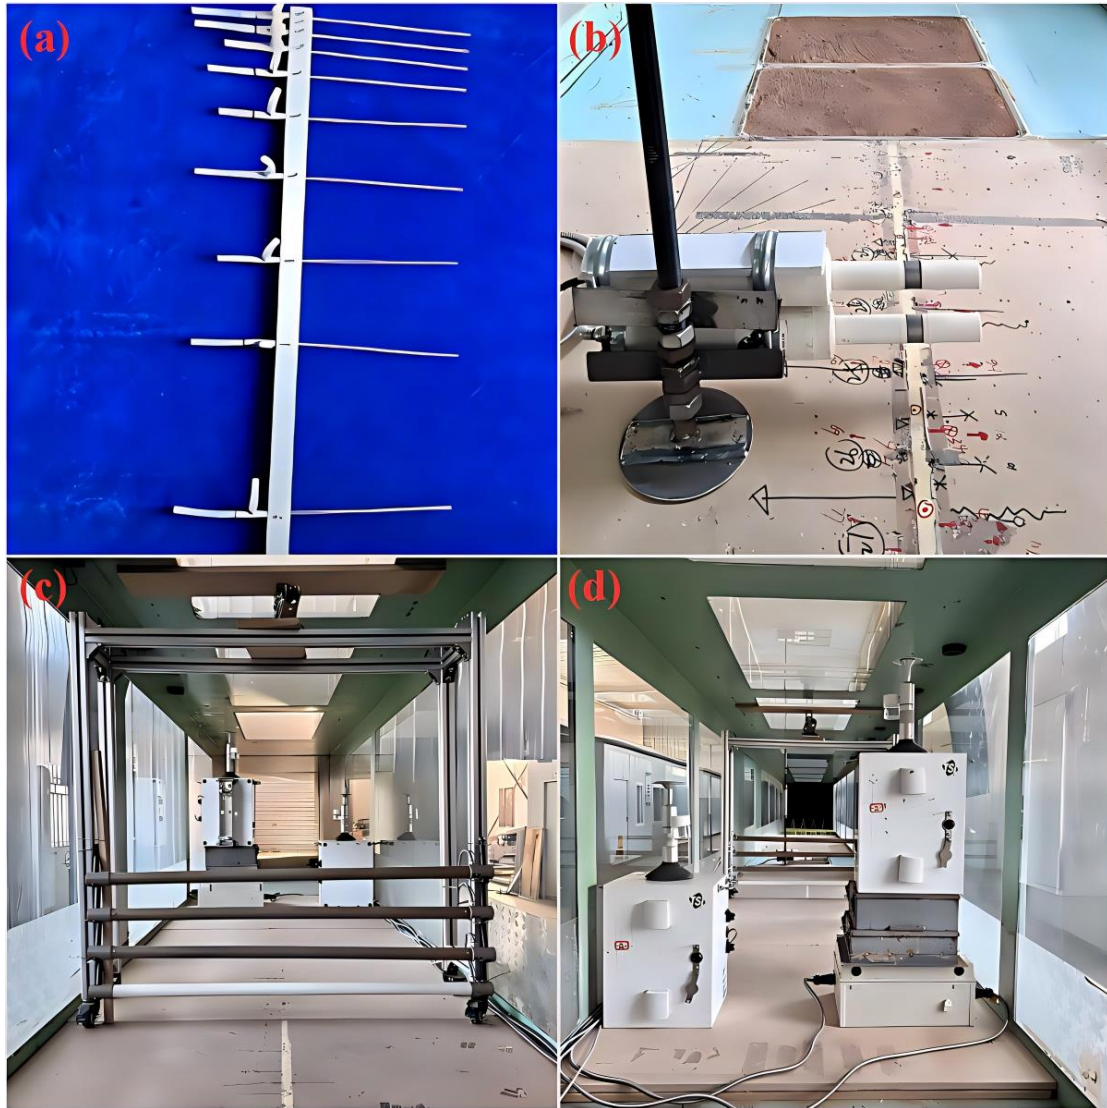

Figure S2. Photograph of the cross-sectional arrangement of the KIMO Pitot tubes, Sensit wind-erosion sensors, SandFlow4 sand-flow sensors and DustTrak aerosol monitors, respectively.

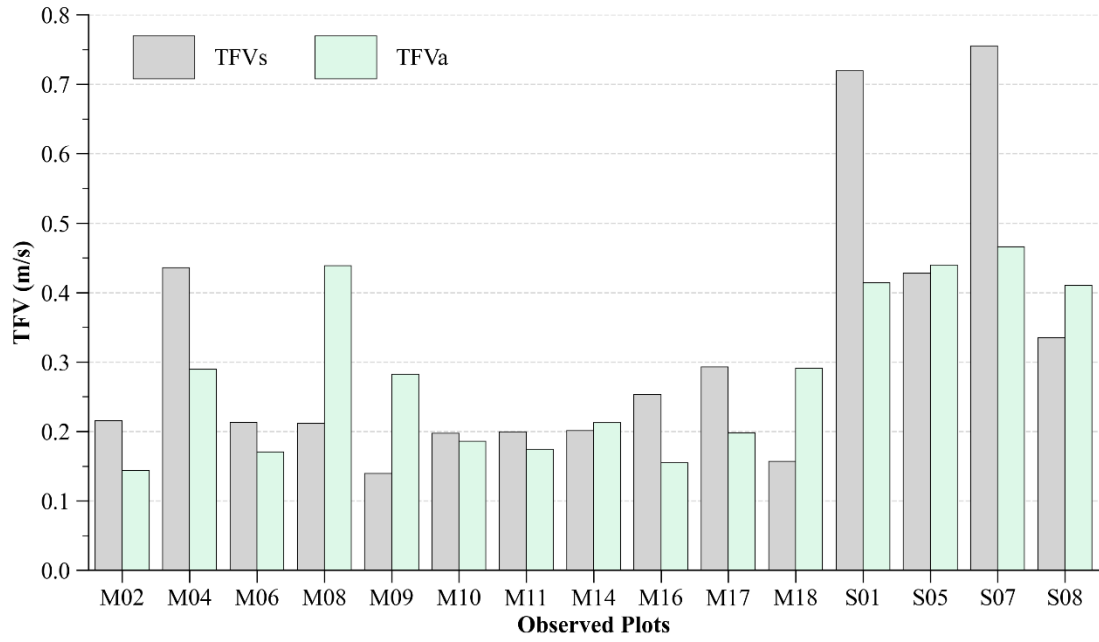

Figure S3. Calculated TFVa and TFVs for sites where both aerodynamic entrainment and saltation bombardment were observed.

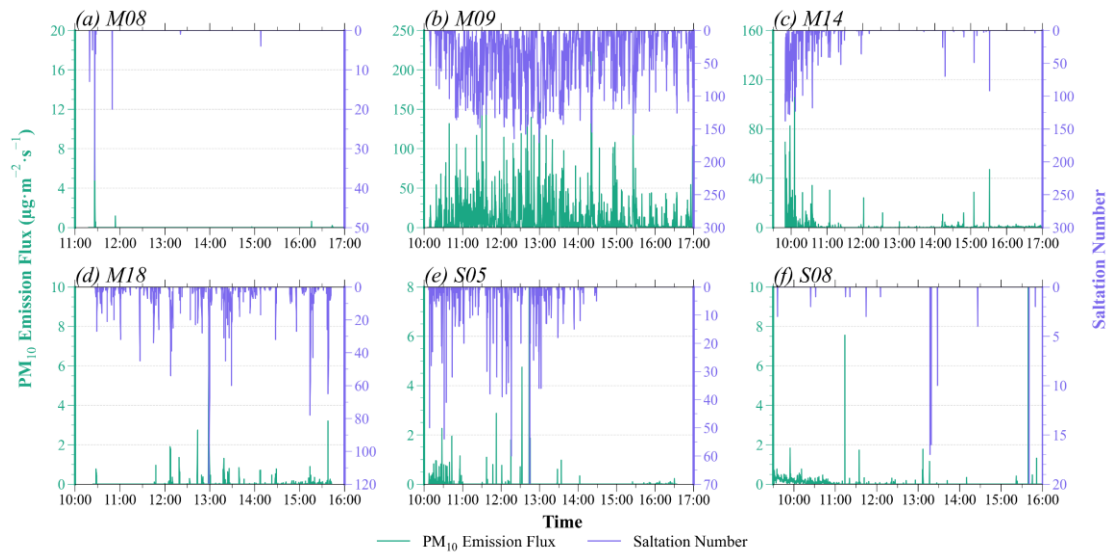

Figure S4. Time-series variations of PM<sub>10</sub> emission flux and the corresponding number of saltating particles at plots where TFVa exceeds TFVs.
